# Supplementary material for: Self-labeled magneto nanoprobes using tri-aminated polysorbate 80 for detection of human mesenchymal stem cells
Source: Royal Society of Chemistry journal article supplement (doi:10.1039/b912149h), 2009-01-01
Supplement: b912149h.pdf [file b912149h.pdf]

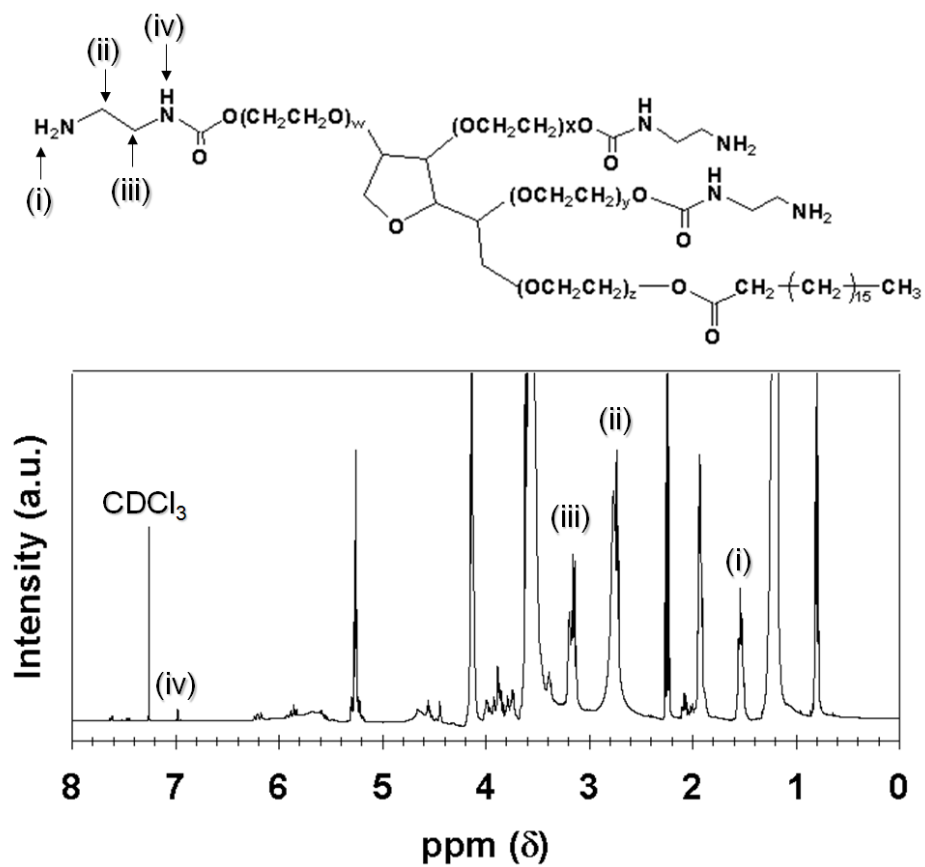

**Figure S1.** <sup>1</sup>H-NMR spectrum of tri-aminated polysorbate 80 (TP80).

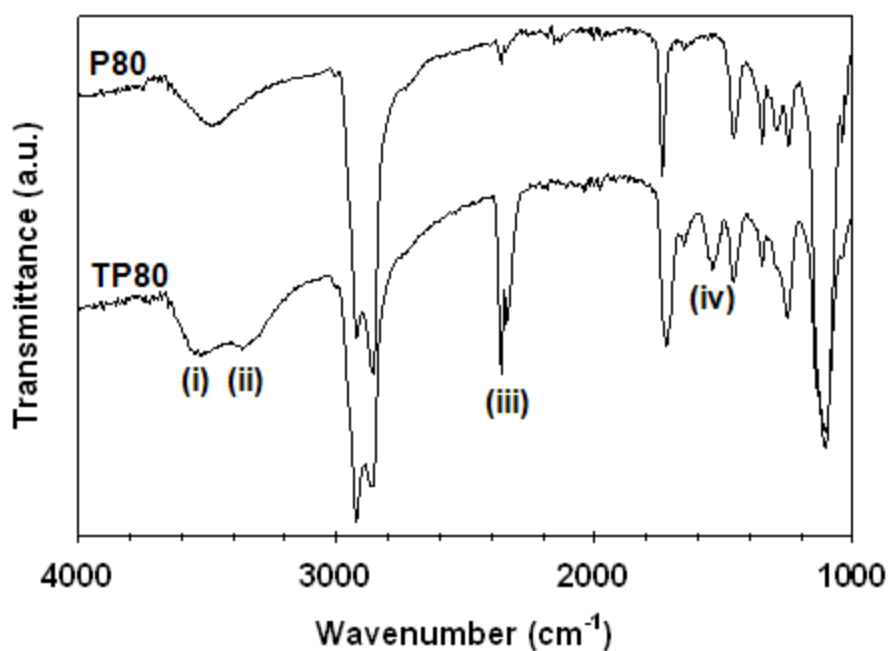

**Figure S2.** FT-IR spectra of polysorbate 80 (P80) and tri-aminated polysorbate 80 (TP80); (i) N-H stretching of amine group, (ii) C-N stretching of amide group, (iii) O-CO-CH<sub>3</sub> stretching, (iv) N-H banding of amine group.

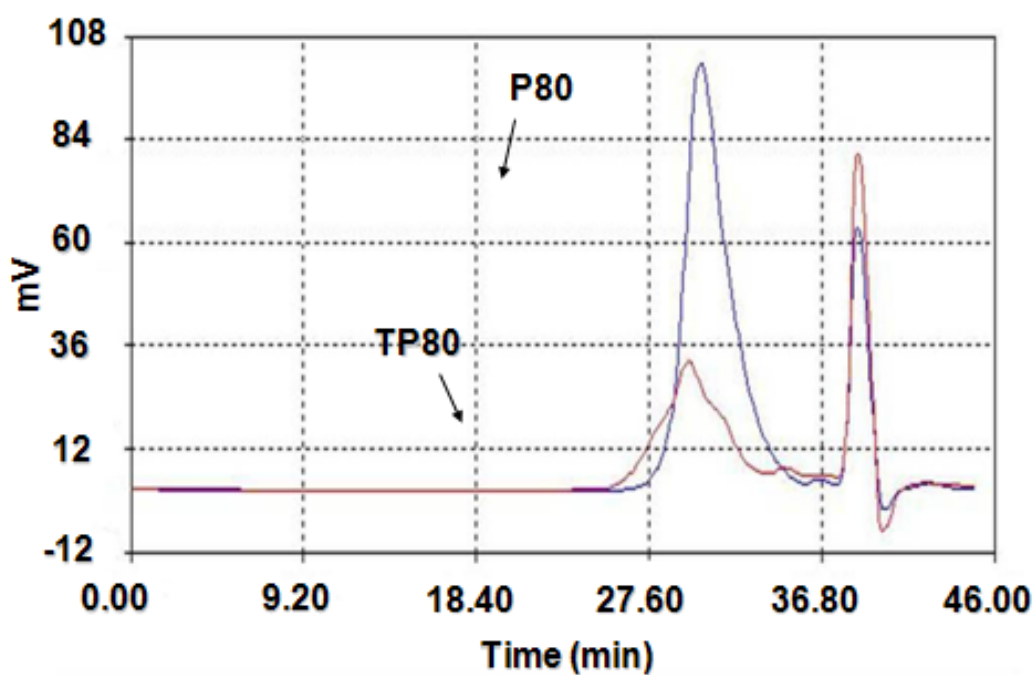

**Figure S3.** Gel permeation chromatography (GPC) of P80 and TP80.

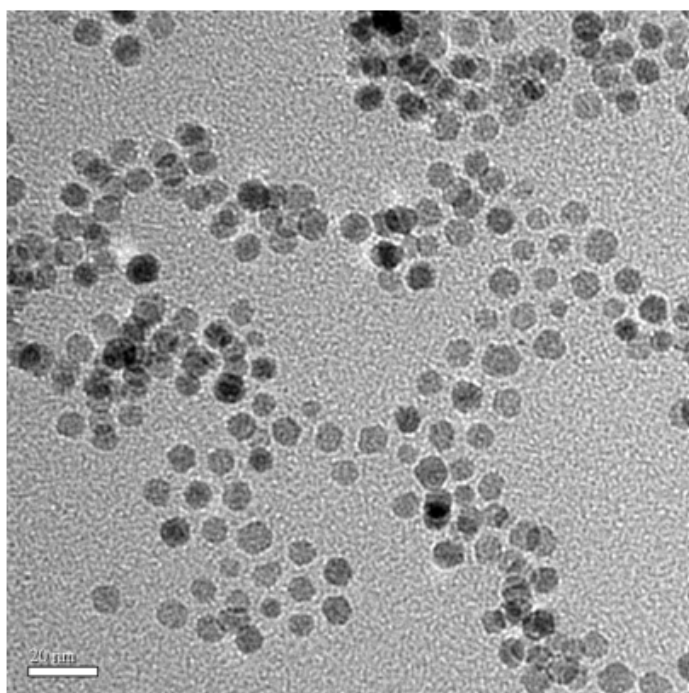

**Figure S4.** TEM images of self-labeled magneto nanoprobe (SLMN) in aqueous solution (Scale bar: 20 nm).

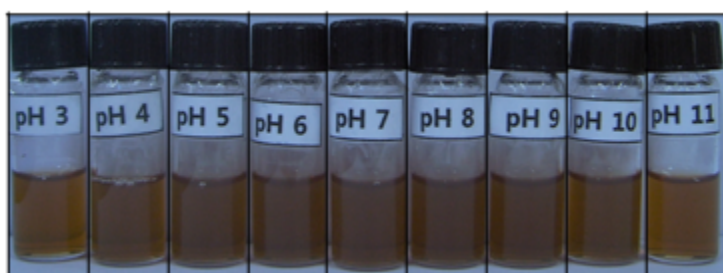

**Figure S5.** Stability tests of SLMNs against pH condition.
